# Supplementary material for: PMMA-supported hybrid materials doped with highly near-infrared (NIR) luminescent complexes [Zn(L1)(Py)Ln(L2)3] (Ln = Nd, Yb or Er)
Source: Royal Society of Chemistry journal article supplement (doi:10.1039/c4nj02373k), 2015-01-01

Supporting information for *New J. Chem.*

**PMMA-supported hybrid materials doped with highly near-infrared (NIR) luminescent complexes [Zn(L<sup>1</sup>)(Py)Ln(L<sup>2</sup>)<sub>3</sub>] (Ln = Nd, Yb or Er) from both Salen-type Schiff-base ligand H<sub>2</sub>L<sup>1</sup> and β-diketonate ligand HL<sup>2</sup>**

**Chao Yu,<sup>a</sup> Zhao Zhang,<sup>a</sup> Lin Liu,<sup>a</sup> Hongyan Li,<sup>a</sup> Yani He,<sup>a</sup> Xingqiang Lü,<sup>\*a</sup> Wai-Kwok Wong<sup>b</sup> and Richard A. Jones<sup>c</sup>**

*<sup>a</sup>School of Chemical Engineering, Shaanxi Key Laboratory of Degradable Medical Material, Northwest University, Xi'an 710069, Shaanxi, China*

*<sup>b</sup>Department of Chemistry, Hong Kong Baptist University, Waterloo Road, Kowloon Tong, Hong Kong, China*

*<sup>c</sup>Department of Chemistry and Biochemistry, The University of Texas at Austin, 1 University Station A5300, Austin, TX 78712-0165, United States*

To whom correspondence should be addressed.

\*Xingqiang Lü: 86-29-88302312(o); E-mail: [lvxq@nwu.edu.cn](mailto:lvxq@nwu.edu.cn)

**Supporting information**

**Table 1S.** Selected atomic distances (Å) and bond angles (°) for **3**.

|                 |          |                 |           |
|-----------------|----------|-----------------|-----------|
| Zn(1)-N(1)      | 2.053(6) | Yb(1)-O(1)      | 2.330(4)  |
| Zn(1)-N(2)      | 2.046(7) | Yb(1)-O(2)      | 2.346(5)  |
| Zn(1)-N(3)      | 2.047(5) | Yb(1)-O(3)      | 2.261(5)  |
| Zn(1)-O(1)      | 2.004(4) | Yb(1)-O(4)      | 2.399(5)  |
| Zn(1)-O(2)      | 2.014(4) | Yb(1)-O(5)      | 2.271(5)  |
|                 |          | Yb(1)-O(6)      | 2.366(4)  |
|                 |          | Yb(1)-O(7)      | 2.274(5)  |
|                 |          | Yb(1)-O(8)      | 2.374(5)  |
| N(1)-Zn(1)-N(2) | 79.9(3)  | O(1)-Yb(1)-O(2) | 69.44(15) |
| N(1)-Zn(1)-N(3) | 112.7(3) | O(3)-Yb(1)-O(4) | 73.03(18) |
| N(1)-Zn(1)-O(1) | 89.8(2)  | O(5)-Yb(1)-O(6) | 72.26(15) |
| N(1)-Zn(1)-O(2) | 144.4(2) | O(7)-Yb(1)-O(8) | 72.66(17) |

**Figure 1S.** Comparison of the determined power X-ray patterns of complexes **1-5** (**1**, red; **2**, green; **3**, blue; **4**, magenta; **5**, yellow line) and the simulation powder X-ray pattern (black line) of complex **3**.

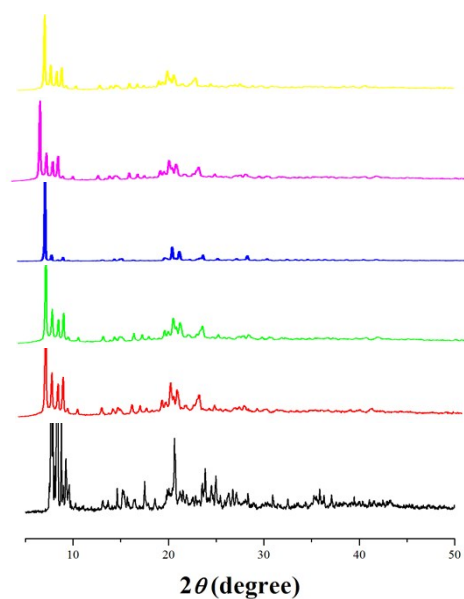

**Figure 2S.** Visible emission and excitation spectra of the two ligands  $\text{H}_2\text{L}^1$  and  $\text{HL}^2$  and the

precursor  $[\text{Zn}(\text{L}^1)(\text{Py})]$  in MeCN solution at  $2 \times 10^{-5}$  M at RT.

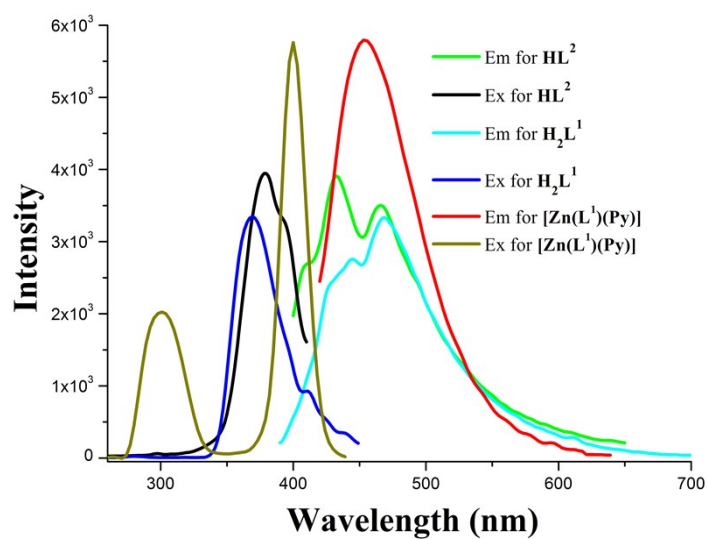

**Figure 2S.** Visible emission and excitation spectra of complex **5** in MeCN solution at  $2 \times 10^{-5}$  M and its PMMA-supported doping hybrid material **PMMA@5** from a feeding molar ratio of 100:1 in solid state at room temperature or 77 K.

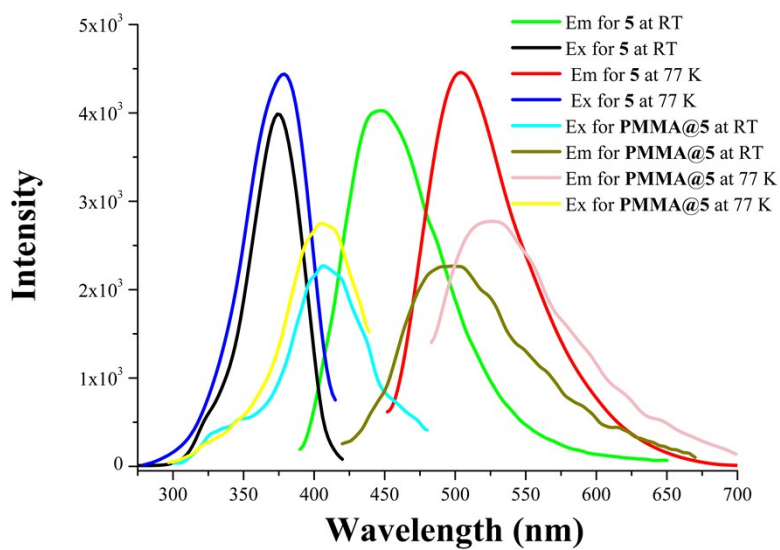

Supplement: c4nj02373k1.pdf [file c4nj02373k1.pdf]
